# Supplementary material for: Agile Stepwise Quality Improvement: Enhancing change and learning in complex and volatile healthcare contexts
Source: Research Square preprint supplement (doi:10.21203/rs.3.rs-7601913/v1), 2025-10-23
Supplement: Supplementary file 1 [file 01cf0e1076666b856f138991.docx]

**Supplementary 2 – Example of quotations from interviews (translated from Swedish)**

|  | **Use and usability of the main features of the Agile Stepwise QI** | |
| --- | --- | --- |
| Main features | Quotations | Quotations |
| Agile test loops | -You are allowed to say what you think, a good idea you can get through, then you can back off and do it again.  -That you had to rethink and get to test small tests all the time that are manageable.  -There is a risk that you say this was too difficult, we do something else instead, you give up and don't work further. | - Sometimes you get frustrated when you must change what you have thought.  - It is appealing that you are given the opportunity to have your say along the way. Not all good ideas are perfect from the start, so even a bull's head can have something sensible to say and you can move from a locked position |
| Stepwise implementation and follow-ups | -This is not so hard and slow, as if everyone must participate. We will test in our small group and then develop (the idea) in phase 1, 2 and 3.”  -You want quick solutions, and we have had to practice that, for example with QRC (previous QI intervention), I have often thought - how difficult can it really be | -It's good that we've tried the small things and then expanded step by step and understood that you may not need to make changes on a large scale, because if you start there, it may not become anything that needs to change. |
| Phase 1  - Problem analyses, prioritizing, in-group small tests and adaptations | -It has gone well, for example doing medical rounds at night and the whole night shift tested. We ticked off in a calendar when you managed to round at night. The one with most times got a prize.  -It was fun to be a test subject, some tests were easier, others more difficult, but since you work regularly at the labor ward, it has been quite easy to test  -I've tried it myself, clinically, it's fun mainly as staff think it's exciting and fun to try new things  -In the team it has varied how you approach the task  -It has worked well. It becomes very clear when you can see where things are not working, then you are able to continue working.  -A lot is based on us people on the floor daring to give suggestions and test. | -The difficulty is that you see on slightly different levels what the problem is and if you dig a little, you come to a deeper level of insight, we have tried that.  -There is a risk that it will be too extensive when you are a little unaccustomed  -We all need to understand the purpose and staff have to be motivated.  -You get the urge to do phase 1. A great way to test but with some concerns that you have to finish properly either by moving to the next phase or closing down.  -They (the management) have delegated more mandate to the floor. The organization is very hierarchical, so it is good that the management still let us (the team) decide. We are sensible people and won't do anything crazy. |
| Phase 2 – Spread to colleagues, medium-size tests, and adaptations | -Team leaders have helped us pass it on to colleagues and suggested that they can test for example “time out” with the doctors and helped us implement the idea. It has worked well; they have not been so reluctant.  -We worked with the group of senior midwives; they are very central to our organization.  -It works for the obstetricians, a smaller group with more continuity in the activities.  -During the theme months, we had quite a few opportunities to provide information.  -We have personally talked to those we want to test our ideas. We have divided up between us so different people talk with different persons. | -Doctors have presented at the doctors' meetings, sometimes sent out written information.  -What has been difficult for us is that the QI team tests and tests, but then to get key people on board, we need joint forums to discuss our test ideas so that other staff become more involved and can take it further.  -It's about finding midwives who can motivate, for phase 2.  -Midwives and assistant nurses have follow-ups at the end of every shift with a moment of reflection and then this approach has been introduced. We doctors are basically never involved, because of different work schedules. |
| Phase 3 – Scaling-up, larger test and adaptations | -We took several rounds with the senior midwives, as they will be at the core of the implementation.  -Our nursing manager often sits in and listens, to know what is going on and to provide support and even protest if something goes outside the frames.  -It depends on the issue. Bigger things, organization and staffing, how we do CS or how many per day, or what times patients should arrive. Then we plan for implementation, together with managers. Think of different steps, need for training, how to inform and follow-up.  -We had one manager for obstetricians involved in certain parts when it is time for larger changes. invited her in the QI team as a backup and to provide support for reaching out. | -Many new people, assistant nurses, midwives, high staff turnover. I have talked to them. Getting new staff to understand our work with QI teams, everyone needs to be aware.  -The difficult part is to get from phase 2 to 3, from testing in a slightly larger group to implementing throughout the unit, you need patience and support.  -It's hard, a lot of improvement work is going on in the unit, hard to keep up and get all staff to understand. You must keep reminding them, nag and not give up.  -It's not a quick fix if the entire unit is to be included. We are convinced, but we must get the whole unit involved, everyone should know, get information, and some do not read.  -It's a difficult environment to do things in, at the same time we have to regardless of chaos. |
| Retrospective reflections and learning | -It was really good. We haven't tried it ourselves; the facilitator has held it. It is nice as you think you are just working and not getting anywhere, but if you do a retrospect, you get a completely different picture, that we have done a lot. It is nice to get a receipt that we're doing something, pat ourselves on the back. You leave feeling pretty happy."  -It is easy to remember what we haven't managed to do, what has gone well is easier to forget. | -It was nice because you were reminded of how much you had done when it felt like if we hadn't gotten that far, you got more energy.  -It's difficult to make room for retrospectives. People need to participate, and it should make sense, if the medical group is not involved and then it will not have their perspective. |

|  | **Impact of Agile Stepwise QI** | |
| --- | --- | --- |
| Impact on | Quotes | Quotes |
| QR work at the unit | -In the past, we have always gone big over the entire workplace, often too extensive. I think this has a better chance of becoming sustainable development.  - Before, it was quite cumbersome, we didn't get anywhere, the way we worked before.  -It has been quick to get people to dare to test outside the inner circle, precisely because it is a test and not another thing that should change - even though it is really the same thing. | -Since I came to this unit there have been lot of changes, and very slow. The willingness to change is not high and resistance is great, so this way of working has made it smoother.  -You don't have to run everything in full scale, it's fine to say no, it doesn't work, then we do something else to achieve results. |
| Individual level Key-actors | -It doesn't feel so daunting and cumbersome to try new things and I don't feel so negative.  -It has affected me positively, it is fun to come up with a new idea when you see that it works, you are encouraged to do something new.  -It has changed my way of thinking not only about work but also at home, thinking differently. That we try this, and it can work without the family members even understanding that they are part of a small test. I didn't have that insight before agile thinking. | -Both as a former manager and now as an employee, it feels a little less cumbersome with this way of working.  -For me, it feels very tempting to work in an organization that has this agile way of working, not only in care but in all other parts, that you dare to be a little less controlled. I wish we could spread it to the management team. Do a very advanced problem analysis. |
| Group level  QI teams | -I think a lot has happened. We in the group feel that we have a completely different view of how to change in a positive way without a negative outcome.  -People in the QI team have changed personalities a lot and think in a completely new way. They have a completely different impact on their group, much more positive.  -It has increased creativity and the wealth of ideas. It invites you to dare to be creative.  -I think it aided to find what to focus on because so much that pops up, but we said we will take that to the next problem analysis. We learned not to start so many tests but to stick to few.  -We in the QI team can do small things ourselves and as we get more evidence that it works, we can then bring it to the entire work group.  -If it doesn't work in our small group, there's no point in continuing if we don't adjust the idea.  -There has been a lot of positive feedback, but you also need negative signals to know what to change. | -Important lessons when we expand the tests, then other insights that can contradict comes, which are good to include.  -If you listen enough to all staff categories and take it in, it becomes easier to implement. Then you have several perspectives and can organize accordingly.  -I think the creativity and inspiration has been greater even when we had setbacks… but then we say ok we try something new.  -The biggest learning is that we are allowed to start with small things and a quick start. We have said many times, this is so easy and simple, we don't have to ask the managers. I believe in this approach very much.  -I've had to learn new ways, before things were fast and wrong, not always completely wrong but very fast. I'm used to people that figure out the whole concept, get approval and then quickly move on. This way is easier even if it takes longer, it probably gives better compliance. |
| Organizational level  Obstetric unit | -The fact that you can do QI in this way, try to implement in a large group, this means that people are reasonably positive about it.  -In the beginning they were a bit frustrated, you are going to try this. It was unusual for us to come with many ideas. But I think they've gotten used to it and have seen that it leads somewhere.  -Positive, I think they understood that it is not so dangerous to test, they understand that when we change for example the computer’s location, they understand there is an ulterior motive.  -Important to see the pause button. I think the QI team really used the pause button and gone back, what went well, what didn't go well.  -I hope both midwives and managers understand that it's ok to try different things without anyone getting sad or upset because they think a large change is coming.  -New staff feel safe in testing, for example this with risk assessments. Young people don't have a hard time; this is learning and confirmation of medical things.  -In general, we have a different mentality here. People come in the morning and say what are we going to test today? We have a more open-minded attitude to new things. The big benefit is that we are getting a group of employees who are more positive about trying new things.  -That we got the whole staff on board in the ward; it was a big concern with such large group of staff where many people think changes are difficult. But we realized we could make changes by starting up and then having some previous experiences. | -I think it takes away a stress element when it's a processed concept we come with.  -The ones who think it's the most fun are the ones closest, namely the other QI teams.  -I know that it has spread a bit to the other QI teams.  -I think the senior midwives have been affected; we used them a lot in our QI teams. It has been helpful that others understand when we work on the same thing, then you can get help in a different way. It is good with the senior group  -Quite a few people who are influential, interested and important spontaneously tell and spread their thoughts.  -Many in the workplace know about this and dare to comment or come up with ideas, i.e. the small testing approach instead of changes from above with unknown preparations.  -A lot of people know about this now, managers but also many staff on the floor, not everyone, we have such a large turnover so not the new ones.  - Manager-wise, only one manager has been involved, I don't think the others are familiar but think to test it would be great for them, for example reflect on their own investments.  We would have to spread the information to the other managers. I know that there is a lot to do for the managers so they can't take no more. I think you don't just have to invest in nursing managers but also in the medical managers. |
