# Supplementary material for: Agile Stepwise Quality Improvement: Enhancing change and learning in complex and volatile healthcare contexts
Source: Research Square preprint supplement (doi:10.21203/rs.3.rs-7601913/v1), 2025-10-23
Supplement: Supplementary file 2 [file 1cd0b6f9c2fd093dd33120d6.docx]

**Supplementary 1 – Interview questions**

**Pre-intervention interview - Interview questions – Dec. 2020 – Jan 2021**

Original text in Swedish.

*A) Background facts*

1. What is your function and role within the clinic? What are you responsible for?
2. How long have you been working at the unit?
3. How long have you been a manager/or other function/participating in the improvement team?

*B) Challenges/areas in need of improvement*

1. What in your opinion are the biggest challenges you need to deal with in the coming years within the unit?
2. What do you see as the most important areas for improvement within the unit/ward?
3. Is there anything going on that concern and/or has affected the unit that is good to know to understand your current situation?

*C) Strategies and working methods for improvement and development work*

1. Can you briefly describe the way of working/how you work with improvement and development within the unit?
2. Is there an overall strategy for improvement and development within the hospital/your theme/unit? If yes, please describe.
3. Are there any special functions, roles or groupings that are responsible for improvement and development work at the unit? If yes, please describe.

*D) Competence, knowledge, support and resources for**improvement and**development (sub-levels are questions for the QI team members)*

1. Are there other *support functions* that support/can support the units' improvement and development work elsewhere in the hospital/region? If yes, please describe.
2. 1. Are there any persons within the theme organization or within the unit who are tasked with supporting improvement and development who help or can support the work of the improvement teams? If yes, please describe.
3. What kind of support would you like for yourself when it comes to working with improvement and development?
4. How do you work at *different management levels* to support improvement and development work?

3. What support do you receive as an improvement team from managers and management levels?

1. Is there any *support for managers* at the unit when it comes to working with development issues?
2. What have you done/are you doing to build or *increase* *improvement and development competence* in the theme area/unit?

5. How do you work as an improvement team to build/*increase improvement and development competence* within the unit/ward? For yourselves?

1. Do you have special resources set aside for development in the thematic area/unit/selected improvement areas, e.g. caesarean section? If yes, please describe.

6. Do you have special resources set aside for the QI teams' work with improvement anddevelopment, e.g. in the area of caesarean section? If yes, please describe.

1. Is, and if so how, is the improvement and development work of the theme/unit/team linked to the national program for improving maternity care and women's health (2015-2025)?

*E) Experiences – barriers, enablers, key prerequisites*

1. What do you feel has *worked particularly well or facilitated* when it comes to your work with improvement and development within the unit? In the area of caesarean section?
2. What do you feel has *worked less well/made it difficult* when it comes to the work with improvement and development within the unit? In the area of caesarean section?
3. What are the *most important prerequisites* as you see it to achieve a functioning improvement and development work within the unit? In the area of caesarean section?

*F) Monitoring of development, change and dissemination*

1. How is improvement and development work that is underway followed up?
2. How is the improvement and development work performed within the unit/wards/the improvement teams evaluated?
3. Is there an established procedure within the organization or unit for evaluation of improvement and development? If yes, please describe.
4. How do you work to ensure that good solutions/new ways of working/important changes done are sustainable within the unit/ward?
5. How do you spread good solutions/new ways of working/important changes within and between units/wards/groups?

*G) General approaches to change and development/Needed improvements and proposals*

1. There are a few different areas that concern development with different names – systematic improvement/quality work; knowledge implementation and innovation/innovative development – has what you described about ways you work in the organization been applied to all of this or some part?
2. Describe how do you work in the unit with the areas above that you have not touched on?
3. If you could wish freely – what is most in need of improvement and what would you like to improve/develop *in terms of being able to work with development and improvement* in the unit?
4. Do you have any suggestions on *how* this improvement you have described could be done?
5. The workshop held in September for the managers at the unit to inform and prepare for testing an adjusted improvement work approach – has it had any impact in any way? If yes, how?
6. Is there anything else that has happened during the autumn that has affected your or your work or view of improvement and development at the unit in any way?

*E) Other input*

1. Is there anything else of importance that you want to convey? Something that we haven't touched on?

**Post-intervention interview: Interview questions – June 2022 – Sep 2022**

Original text in Swedish. Questions for managers and senior midwives were adjusted to capture both 1) their own testing of the approach and 2) their views on the QI-teams work. Some questions in italics were posed non-QI team members.

### ***A) Experience – (control question):***

An attempt to develop the improvement and development approach at the unit started in January 2021. First, a question to get an overview of your insight or participation in this attempt.

1. Have you been involved in the attempt – and if so, how/where? In the improvement team? Other? Extent? How long?

### ***B) Agile Stepwise QI approach***

1. How do you perceive the use of the Agile Stepwise QI approach so far?
2. How does it differ from (the unit’s/the QI team's) previous way of working with improvement and change?
3. What aspects have worked particularly well with the new approach? Why do you think?
4. What aspects have not worked so well with the new approach? Why do you think?

*PHASE 1 (In-grouptesting of small agile ideas):*

1. How do you perceive that the QI teams have worked with PHASE 1 in general?

How has it worked for the teams to perform problem analyses?

1. Have you tried to act as a tester/role model yourself, and if so how has this worked?
2. What have you tested yourself as a tester/role model during this year? What improvement ideas have the QI team tested so far?
3. From what you have seen - How do you think it has worked with the loop - test, follow-up/feedback, reflection/adaptation, test again etc.?
4. How did you yourself and (or) how did the QI team work to adapt the idea?
5. Have you learned any lessons of your own about Phase 1, if so which ones? Any lessons learned in the QI team about Phase 1, if so which ones?

*PHASE 2 (expanded testing via some champions outside the team):*

1. How have you worked with Phase 2 involving colleagues or champions in testing? *How do you perceive that the team has worked with PHASE 2 - expanded the testing via some champions outside the team?*
2. How have you instructed them in what to test and how? *Have you participated in extended testing – if so, how were you instructed by the team?*
3. What lessons have you or you in the team learned about PHASE 2 – extended testing via others?

*PHASE 3 (dissemination of working methods/solutions to the department - with follow-up)*

1. How have you worked with/*or do you envisage working with* Phase 3 where solutions are disseminated to the ward/unit and eventually followed up? *How do you perceive that the team has worked with* PHASE 3 – scaling up to the ward/unit?
2. What did you do/ *or plan to do* to get a mandate to introduce something throughout the department? How were the managers involved?
3. What lessons have you or you in the team learned about PHASE 3 – scaling up to the ward/unit so far? Have you had to back off?
4. *A part of the working method in all phases is to test, capture reactions, evaluate the test, and adapt/improve (or reject) the solution or new ways of working that are being developed or introduced.*
5. What do you think you in the QI team have learned about follow-up and evaluation? *How do you see the teams' work with evaluating their improvement work? Any change?*
6. What do you think are the challenges?

### ***C) Meta-reflection and learning***

*An important part of the way of working is to strengthen learning – to learn to zoom out, to see how, the process and the way of working you have been through.*

1. How has it worked to strengthen learning? How has any strengthened reflection and learning manifested itself?
2. How has it been to work with the retrospect sessions?
3. Have there been any occasions when you have experienced an “aha moment” when it comes to working with improvements? If so, please describe.

### ***D) Effects and dissemination within and outside the department***

1. How do you perceive that the agile and learning way of working with improvement has affected you?
2. How do you perceive that the agile and learning way of working with improvement has affected the QI team? Describe/or give an example
3. How do you perceive that the agile and learning way of working with improvement has affected other staff at the unit, including managers and senior midwives? Describe or give examples.
4. Have you seen any impact or changes within your test areas? Which ones/how? Examples?
5. Can you see any indications of spread of the approach - or parts of it - to other places in the organization? If yes, describe.
6. What do you think is required to make the agile improvement approach work well and become sustainable over time?
7. What role did having an internal facilitator play during the implementation?
8. Is there any other key role/function that did or further could help or support the work with improvement and development?

### ***Other***

1. Do you have anything else that you would like to add or something that we have not addressed?
